# Supplementary material for: Understanding the effect of alkyl chains of gemini cations on the physicochemical and cellular properties of polyurethane micelles
Source: Royal Society of Chemistry journal article supplement (doi:10.1039/c8bm00431e), 2018-01-01
Supplement: c8bm00431e1.pdf [file c8bm00431e1.pdf]

# Understanding the effect of alkyl chains of gemini cations on the physicochemical and cellular properties of polyurethane micelles

*Zhicheng Pan, Danxuan Fang, Yuanqing, Song, Nijia Song, Mingming Ding, Jiehua*

*Li\*, Feng Luo, Jianshu Li, Hong Tan\* and Qiang Fu*

College of Polymer Science and Engineering, State Key Laboratory of Polymer

Materials Engineering, Sichuan University, Chengdu 610065, China

\*Corresponding author. Fax: +86-28-85405402; Tel: +86-28-85460972; E-mail: hongtan@scu.edu.cn, jiehua\_li@scu.edu.cn

### **FTIR spectra**

The FTIR spectra of polyurethanes were shown in Figure S1. The absorption bands around 3391  $\text{cm}^{-1}$  arise from N–H vibration in urethane groups, while those at 2890 ( $\text{CH}_2$ ) and 1110 ( $\text{C–O–C}$ )  $\text{cm}^{-1}$  are ascribed to mPEG. In the region of 1650~1750  $\text{cm}^{-1}$  (carbonyl region), the peak at 1650  $\text{cm}^{-1}$  is assigned to the hydrogen bonded carbonyl in urea groups derived from GQA. This peak was not found for G0mE1900 without GQA groups. The strong peaks around 1726  $\text{cm}^{-1}$  assigned to urethane carbonyl  $\nu(\text{C=O})$  which arising from the free carbonyl of ester groups in PCL and LDI, free carbonyl of urethane and hydrogen-bonded carbonyl in urethane. In addition, the N=C=O stretching vibration around 2200  $\text{cm}^{-1}$  was not observed, certifying that LDI has been completely reacted.

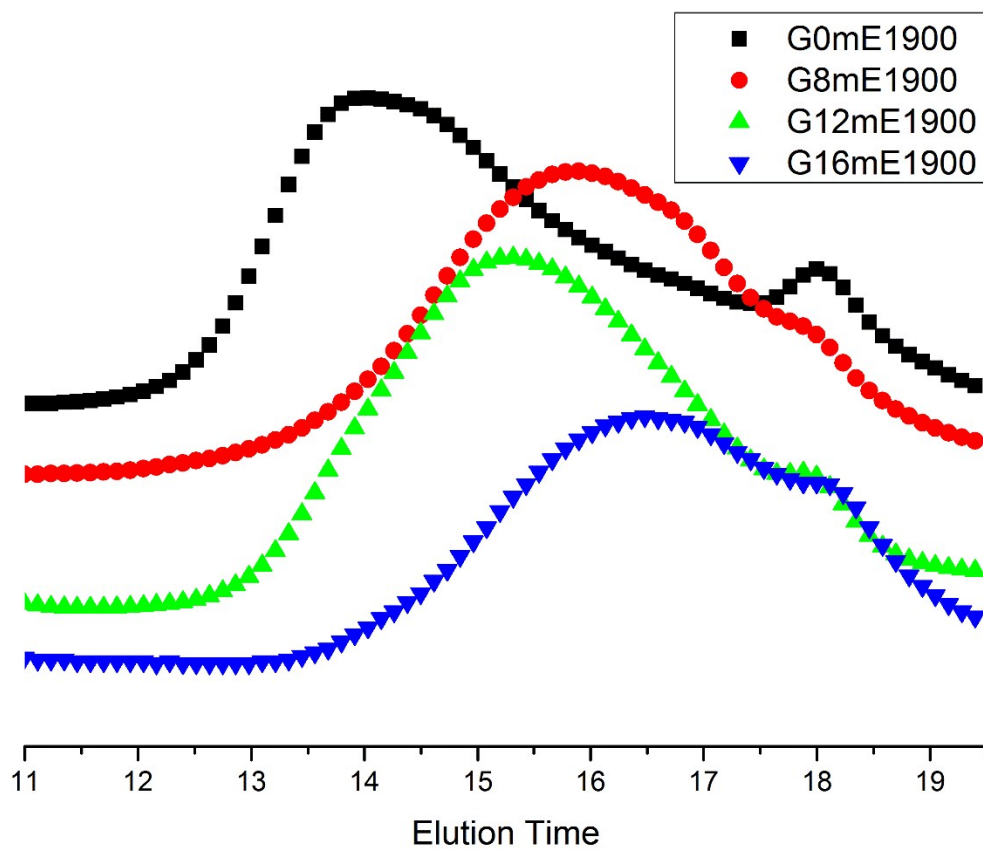

**Figure S1.** GPC curves of GQA-based polyurethane.

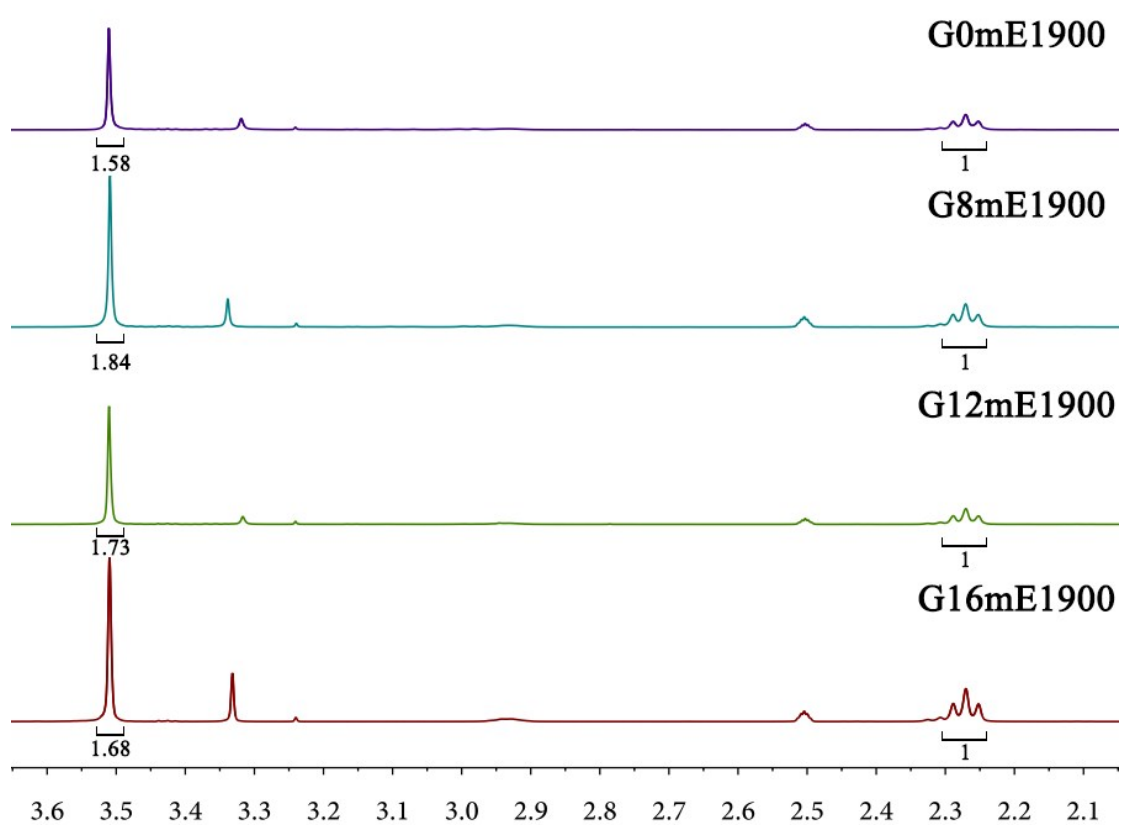

**Figure S2.** The peak area ratio of the PCL at 2.27 ppm ( $-\text{CH}_2\text{COO}-$ ) and mPEG at 3.51 ppm.

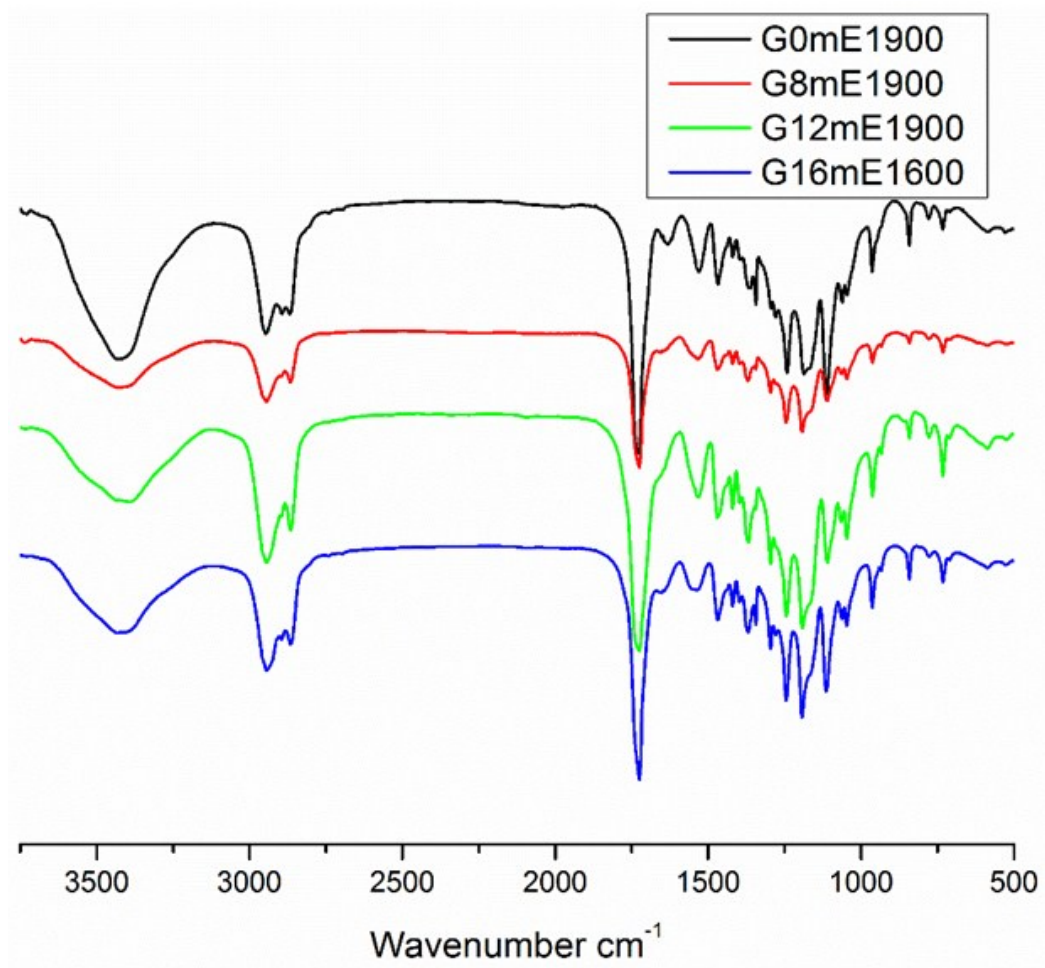

**Figure S3.** FTIR spectrum of G0mE1900, G8mE1900, G12mE1900 and G16mE1900 polyurethanes.

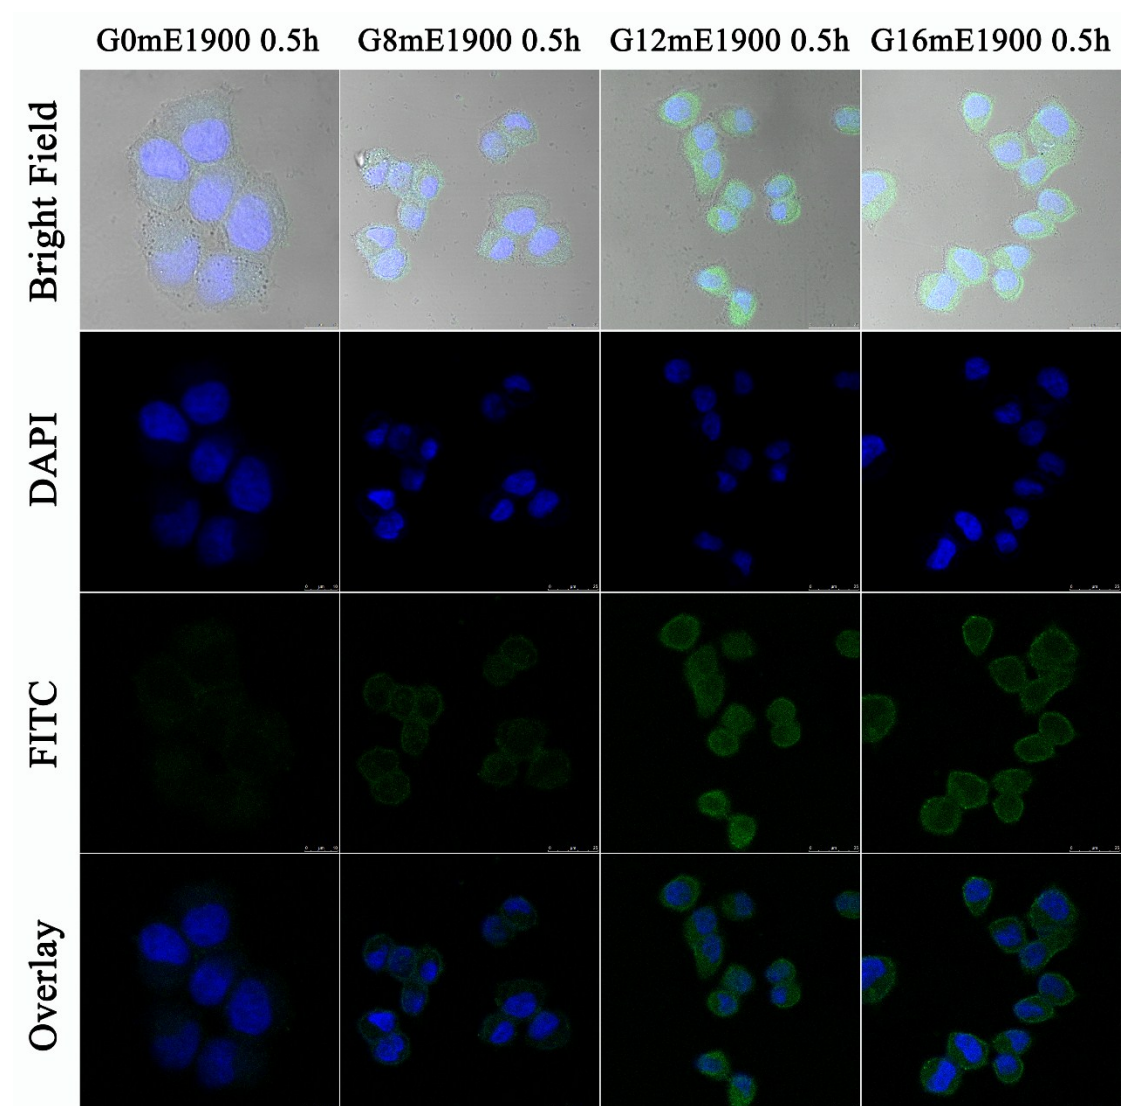

**Figure S4.** CLSM images of HeLa cells incubated with FITC-labeled polyurethane micelles with different GQA alkyl chain lengths for 0.5 h.

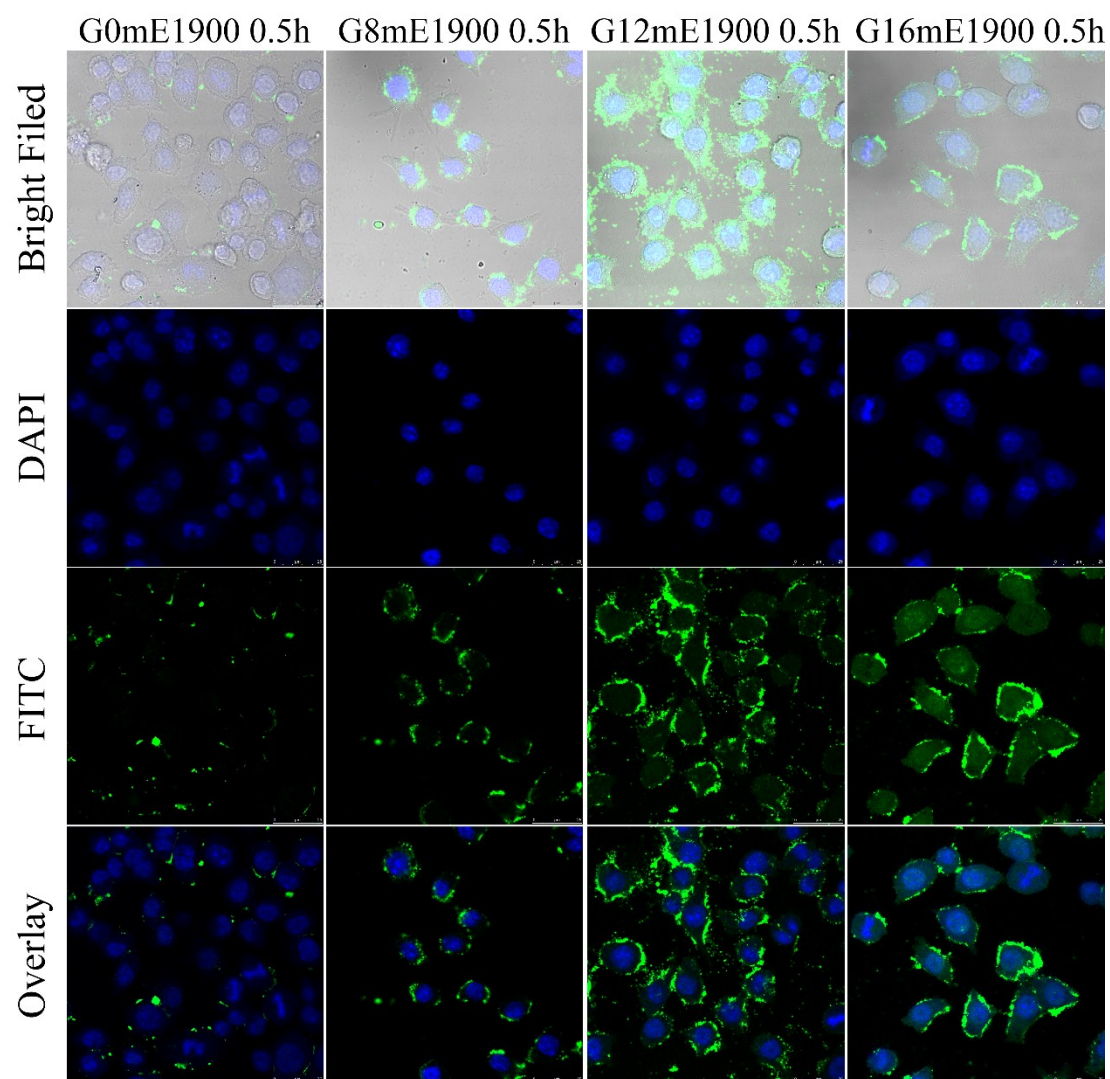

**Figure S5.** CLSM images of Raw264.7 cells incubated with FITC-labeled polyurethane micelles with different GQA alkyl chain lengths for 0.5 h.
